# Supplementary material
Source: Springer Nature journal article supplement (https://www.springermedizin.de/resource/supplementary/12967_2005_106_MOESM1_ESM.pdf/9575732)

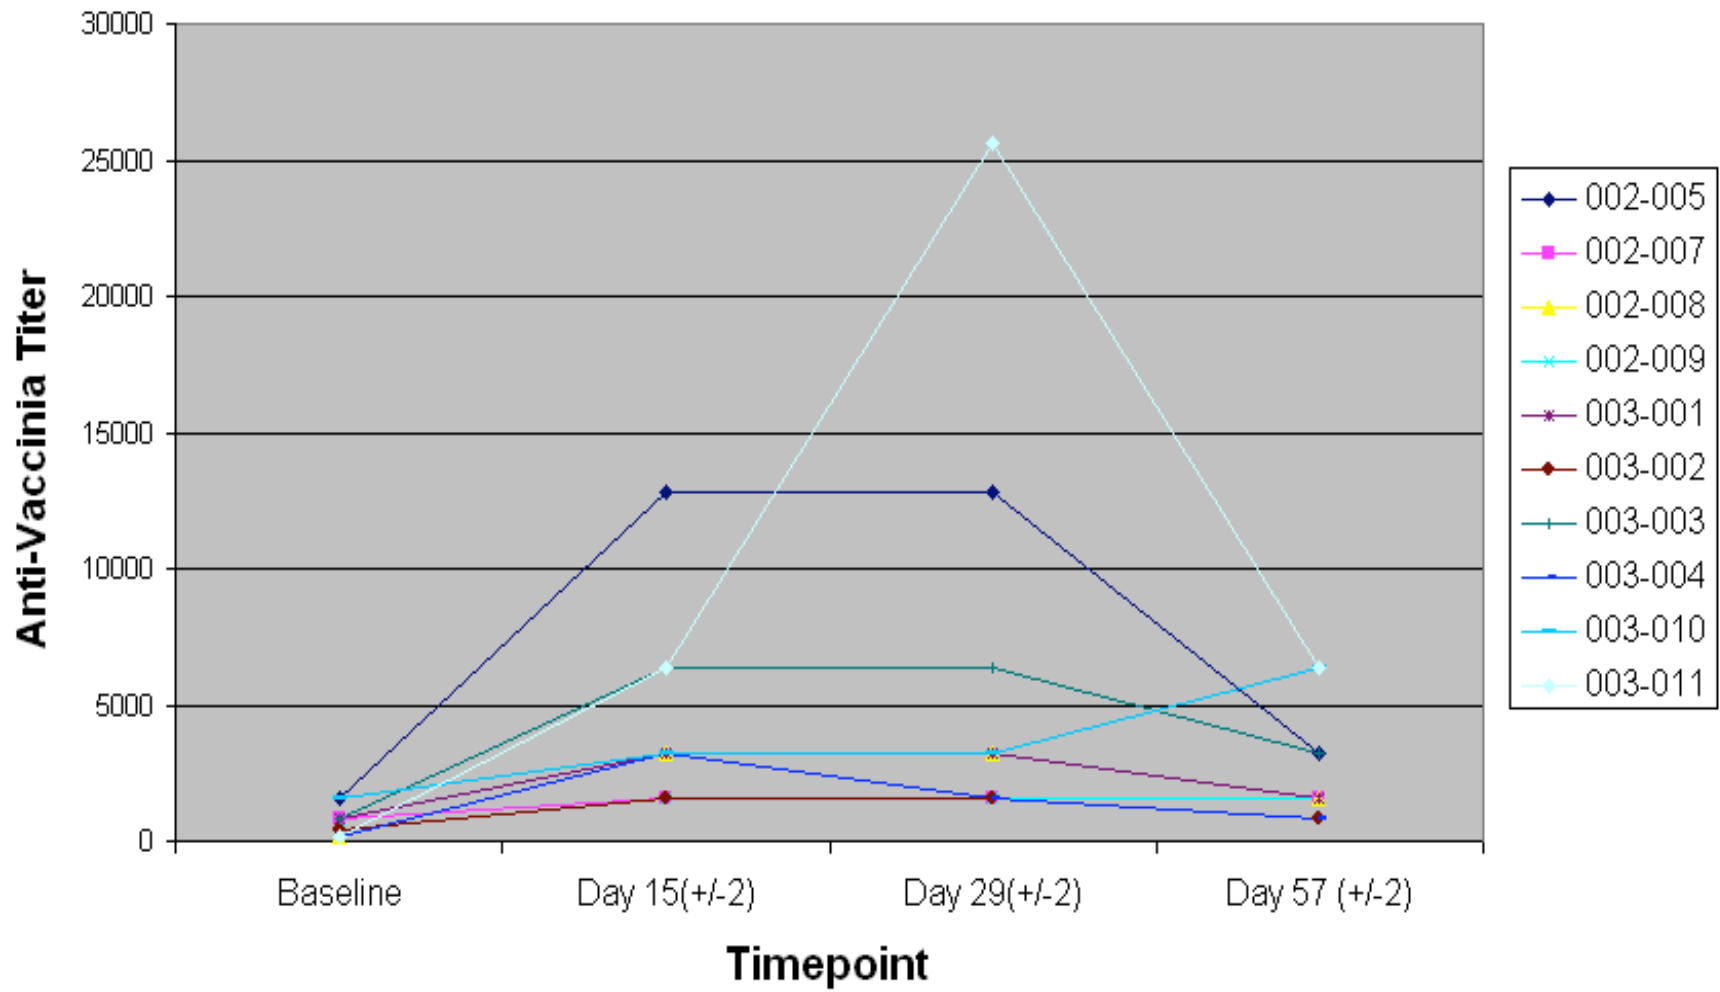

Supplement: MOESM1 [file 9575732]
